# Supplementary figures and images for: Manipulation of Amino Acid Levels With Artificial Diets Induces Anticancer Activity in Mice With Renal Cell Carcinoma
Source: Preprints.org preprint supplement (doi:10.20944/preprints202208.0088.v1), 2022-08-03

**(a)** Liver weights

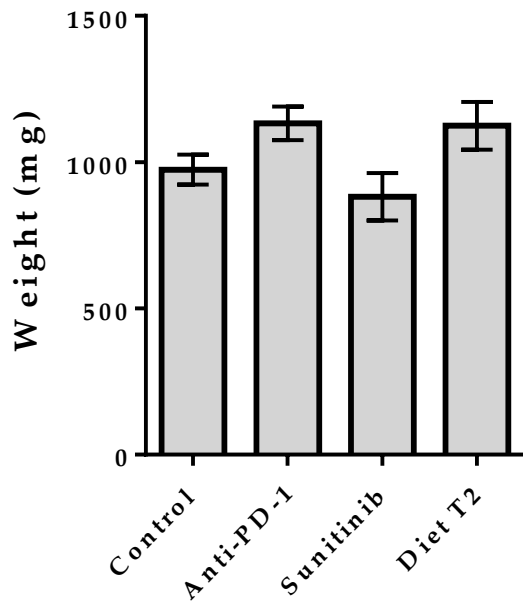

**(b)** Spleen weights

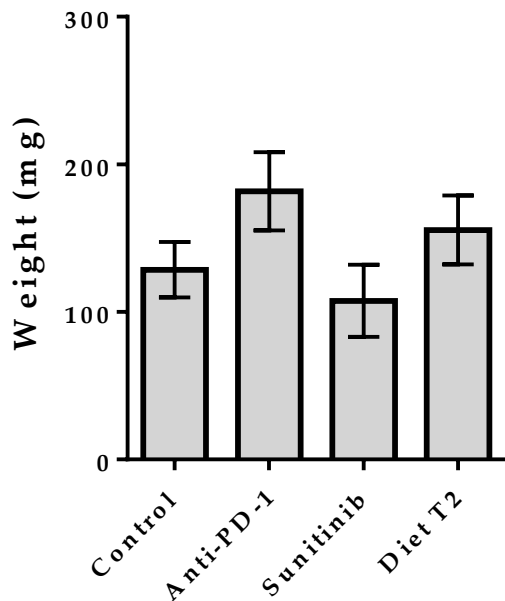

Supplement: Supplementary file 1 [file Suppl. Figure 1.pdf › Suppl. Figures and Video/Suppl. Figure 1.pdf]

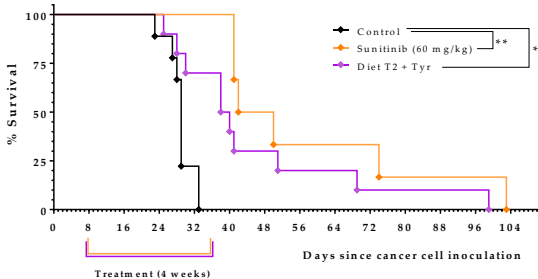

Supplement: Supplementary file 2 [file Suppl. Figure 2.pdf › Suppl. Figures and Video/Suppl. Figure 2.pdf]

**(a)**

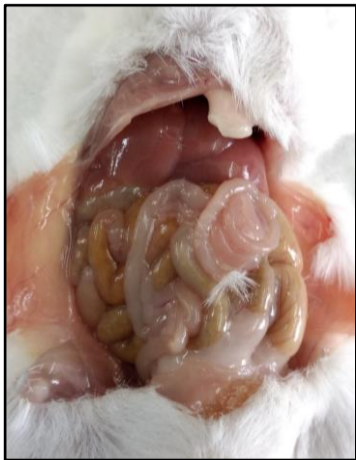

**(b)**

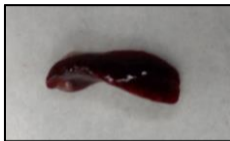

**(d)**

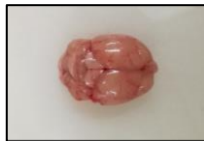

**(c)**

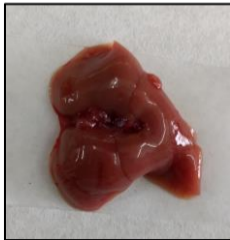

**(e)**

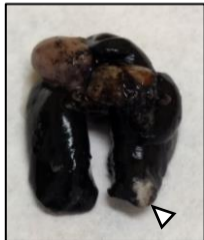

**(f)**

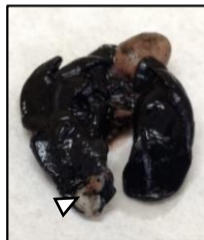

Supplement: Supplementary file 3 [file Suppl. Figure 3.pdf › Suppl. Figures and Video/Suppl. Figure 3.pdf]
